# Supplementary material
Source: PubMed Central journal article supplement (PMC3064170)
Supplement: supp_M110.212704_table.pdf [file supp_M110.212704_table.pdf]

Table S1: Oligonucleotides used for the site-directed mutagenesis

| Primers     | Nucleotide sequences (5'→3')       | NukT derivatives constructed using the primers |
|-------------|------------------------------------|------------------------------------------------|
| nukTQ6A-F   | TGTCTATTAGCGTGTTATTCAATGATT        | Q6A                                            |
| nukTQ6A-R   | GTCTTGGTCACTATTTGCTAATG            | Q6A                                            |
| nukTC12A-F  | GCACTATTAGCGTGTTATTCAATG           | C12A                                           |
| nukTC12A-R  | GTCTTGGTCACTATTTGTAATGC            | C12A                                           |
| nukTH90A-F  | G TTCATTGGGATT TAAATGCATTTGTC      | H90A                                           |
| nukTH90A-R  | AATTATTGGTTTCTTTATTTTACTTATTACTCGG | H90A                                           |
| nukTN106D-F | GGAAAAGTAAAAATTTCAAAGAGATGTTT      | N106D                                          |
| nukTN106D-R | TATCTCTGGGTCGACTATTTCTATAT         | N106D                                          |
| nukTK503R-F | TTAAATGTTCTGTTAGGTCTCTATAC         | K503R                                          |
| nukTK503R-R | CATAGTACTTCTACCTGATCC              | K503R                                          |
| nukTD615N-F | AGTTTGGACAATTACAATCGTATAAATATA     | D615N                                          |
| nukTD615N-R | GCTAAAAGCTTCATTCCAAAAAATTAATTT     | D615N                                          |
| nukTH649R-F | TACTCATAAGTAGACATCTAGATGTTTTAT     | H649R                                          |
| nukTH649R-R | CTATAGTTTTATCGCTATATTGACTATTTT     | H649R                                          |
