# Supplementary material
Source: PubMed Central journal article supplement (PMC3064170)

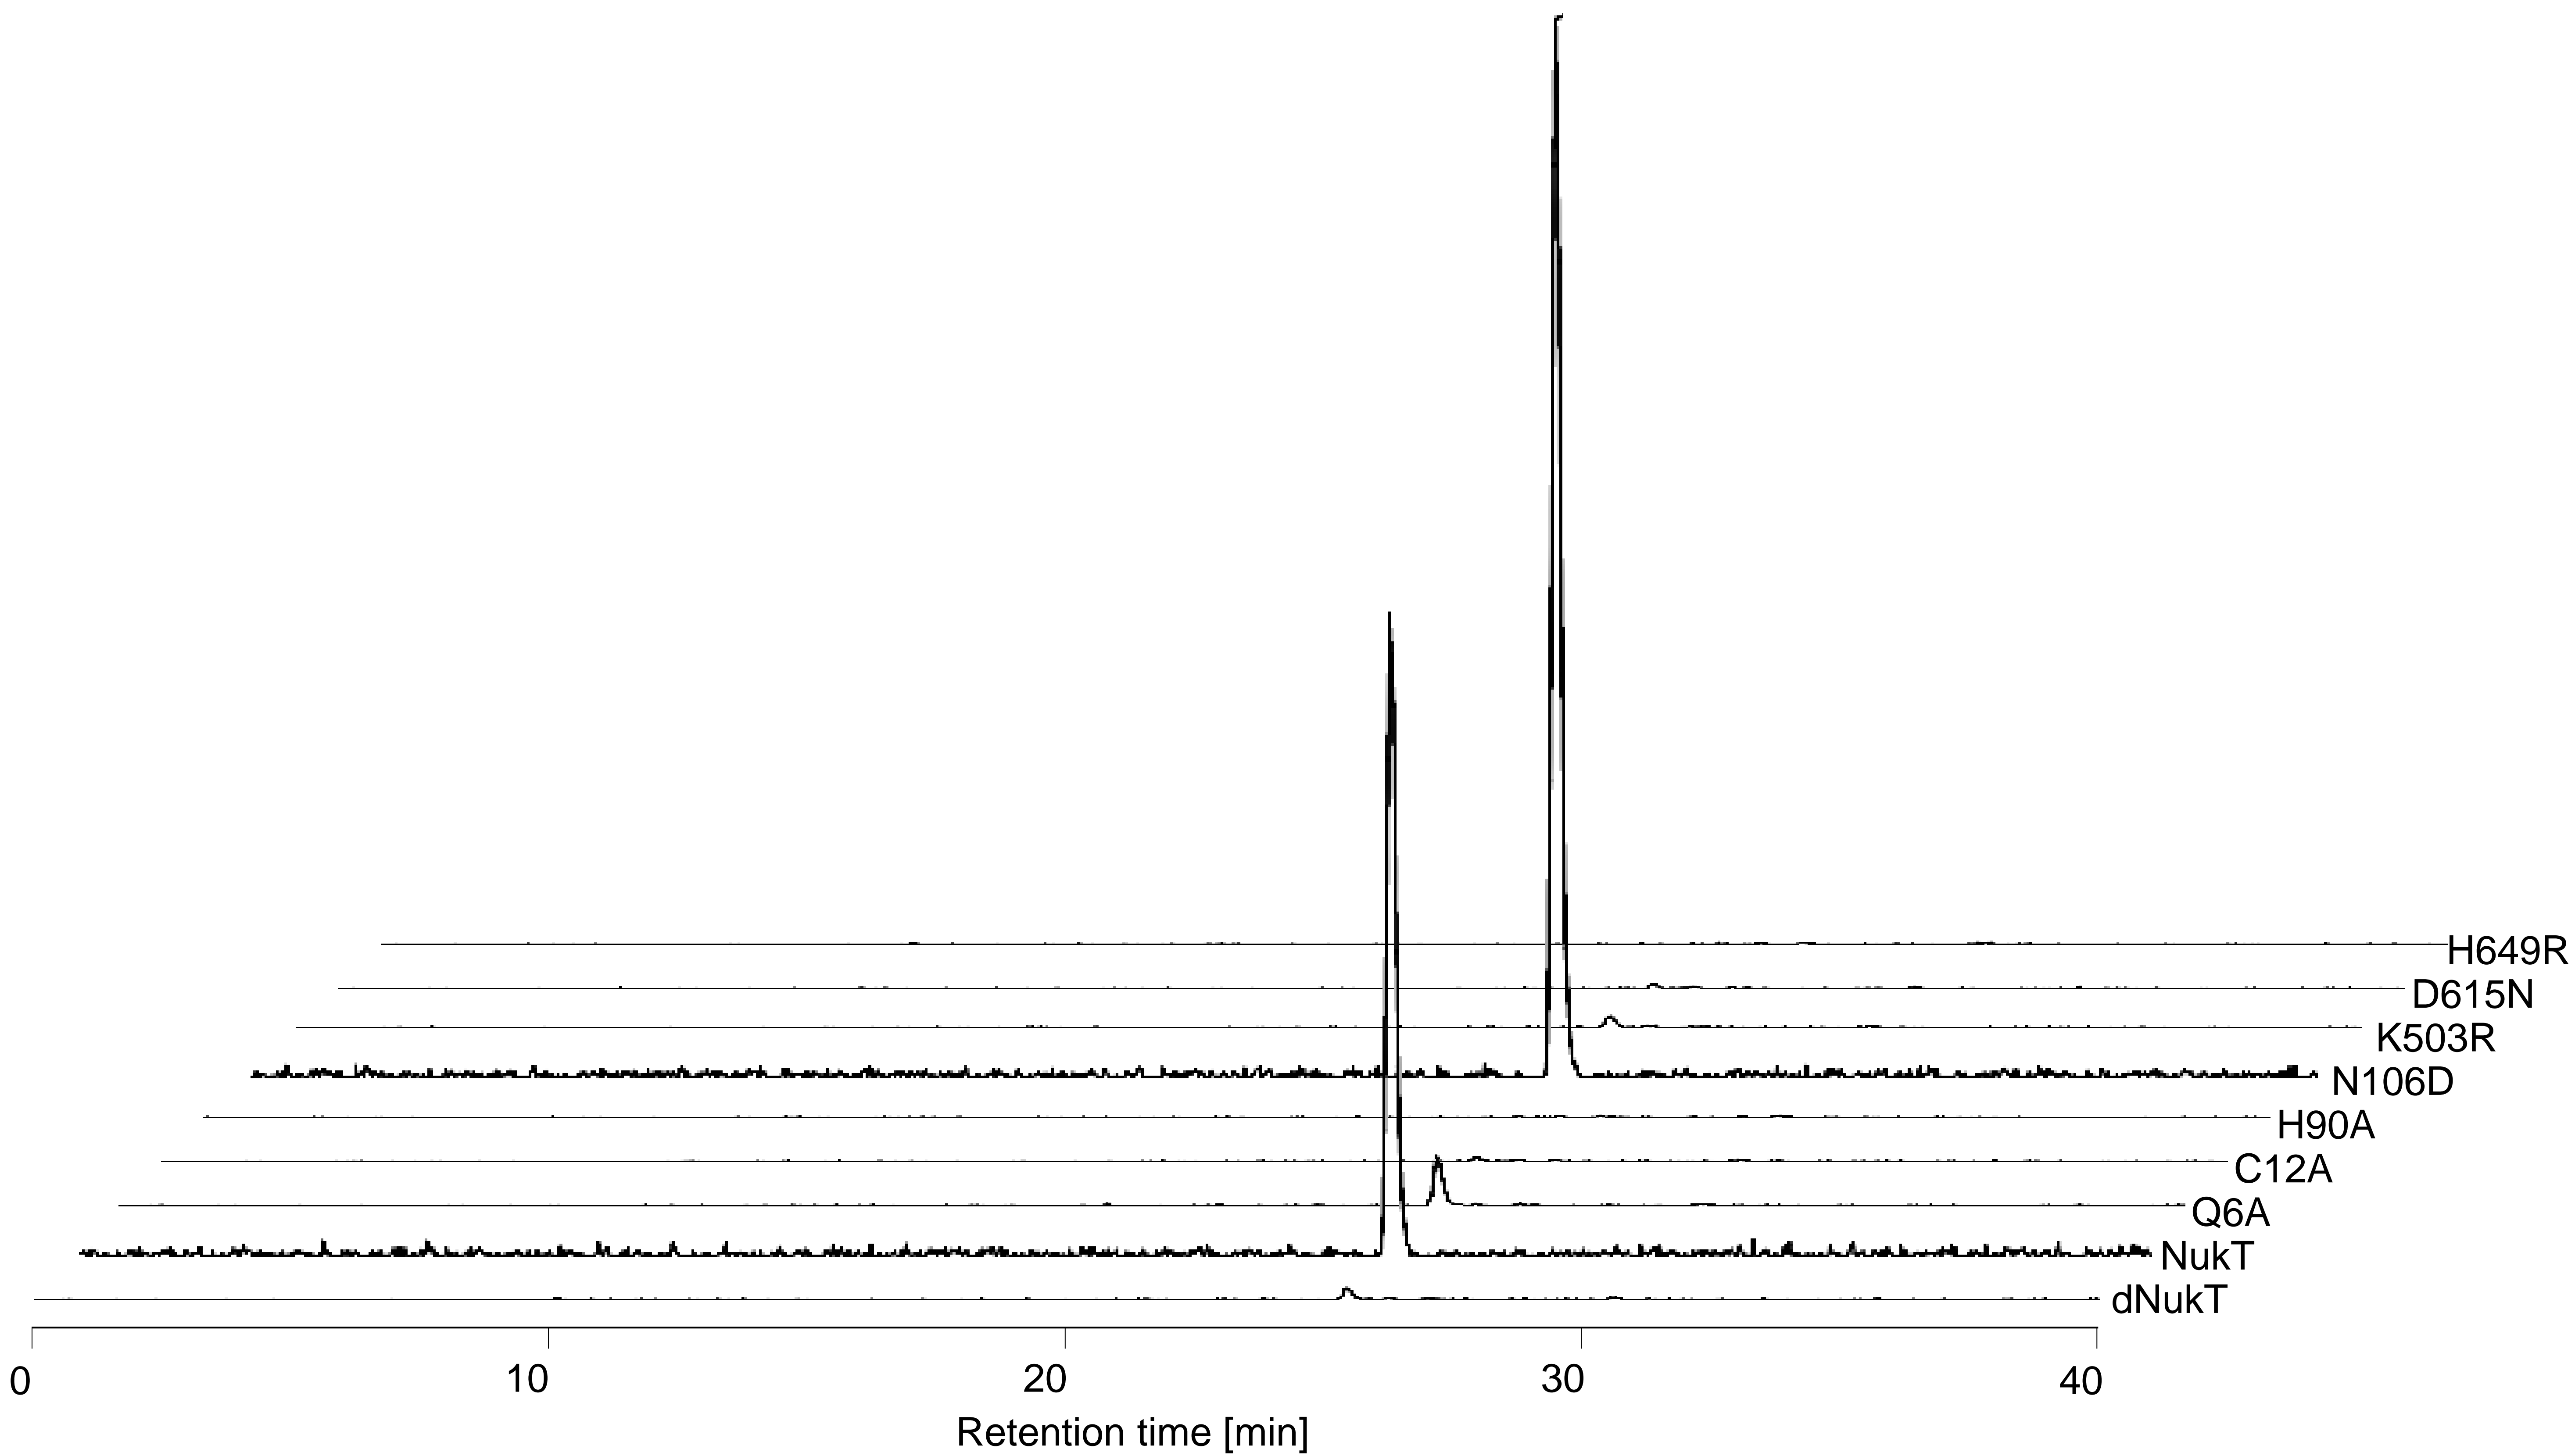

Fig. S1 Nishie *et al.*

Supplement: supp_M110.212704_fig1.pdf [file supp_M110.212704_fig1.pdf]

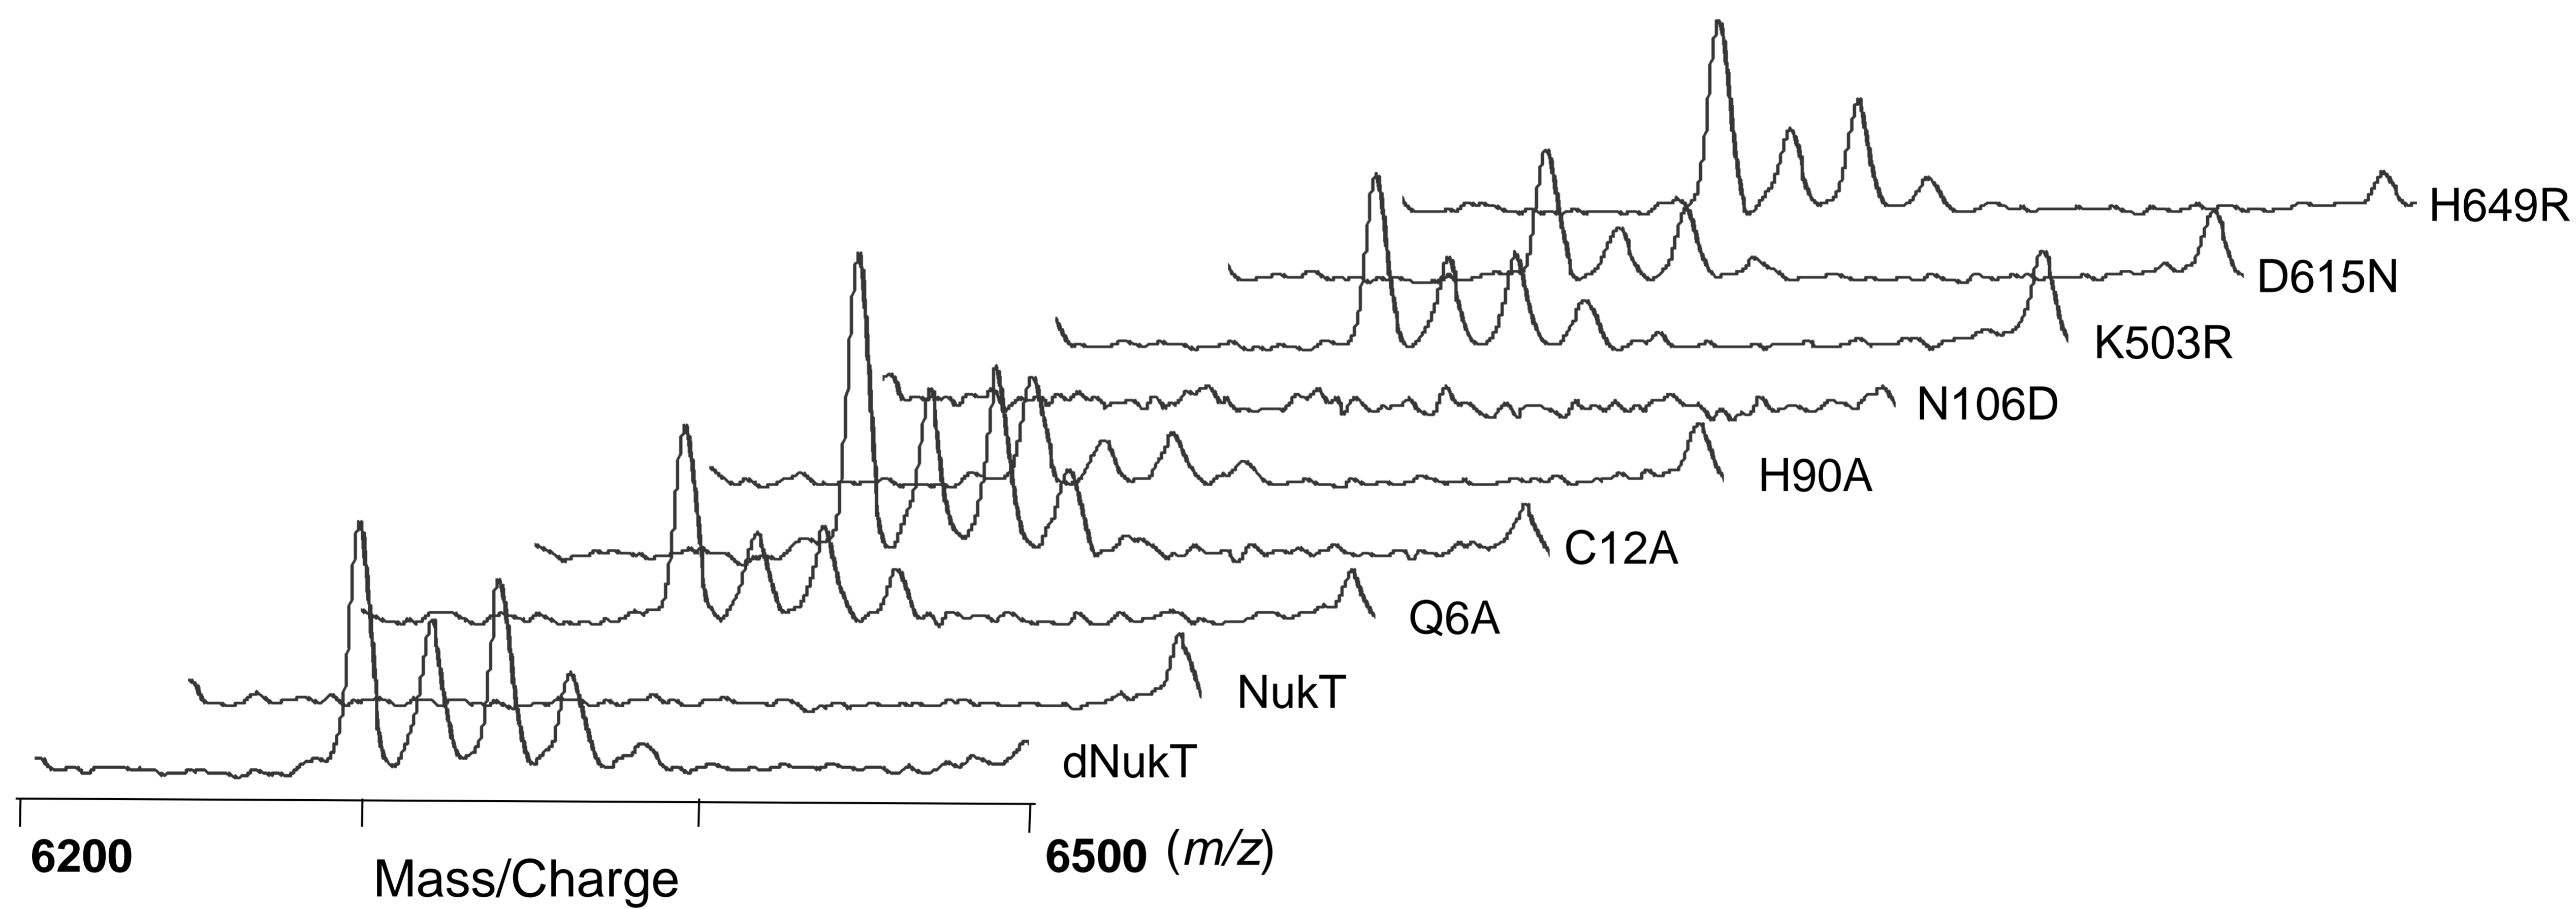

Fig. S2 Nishie *et al.*

Supplement: supp_M110.212704_fig2.pdf [file supp_M110.212704_fig2.pdf]
